# Supplementary material for: Dendrogenin A Enhances Anti-Leukemic Effect of Anthracycline in Acute Myeloid Leukemia
Source: PubMed Central journal article supplement (PMC7601603; doi:10.3390/cancers12102933), 2020-10-12
Supplement: cancers-12-02933-s001.pdf [file cancers-12-02933-s001.pdf]

Supplementary Materials

# Dendrogenin a Enhances Anti-Leukemic Effect of Anthracycline in Acute Myeloid Leukemia

Pierre-Luc Mouchel, Nizar Serhan, Rémy Betous, Thomas Farge, Estelle Saland, Philippe Medina, Jean-Sébastien Hoffmann, Jean-Emmanuel Sarry, Sandrine Silvente-Poirot, Marc Poirot and Christian Récher

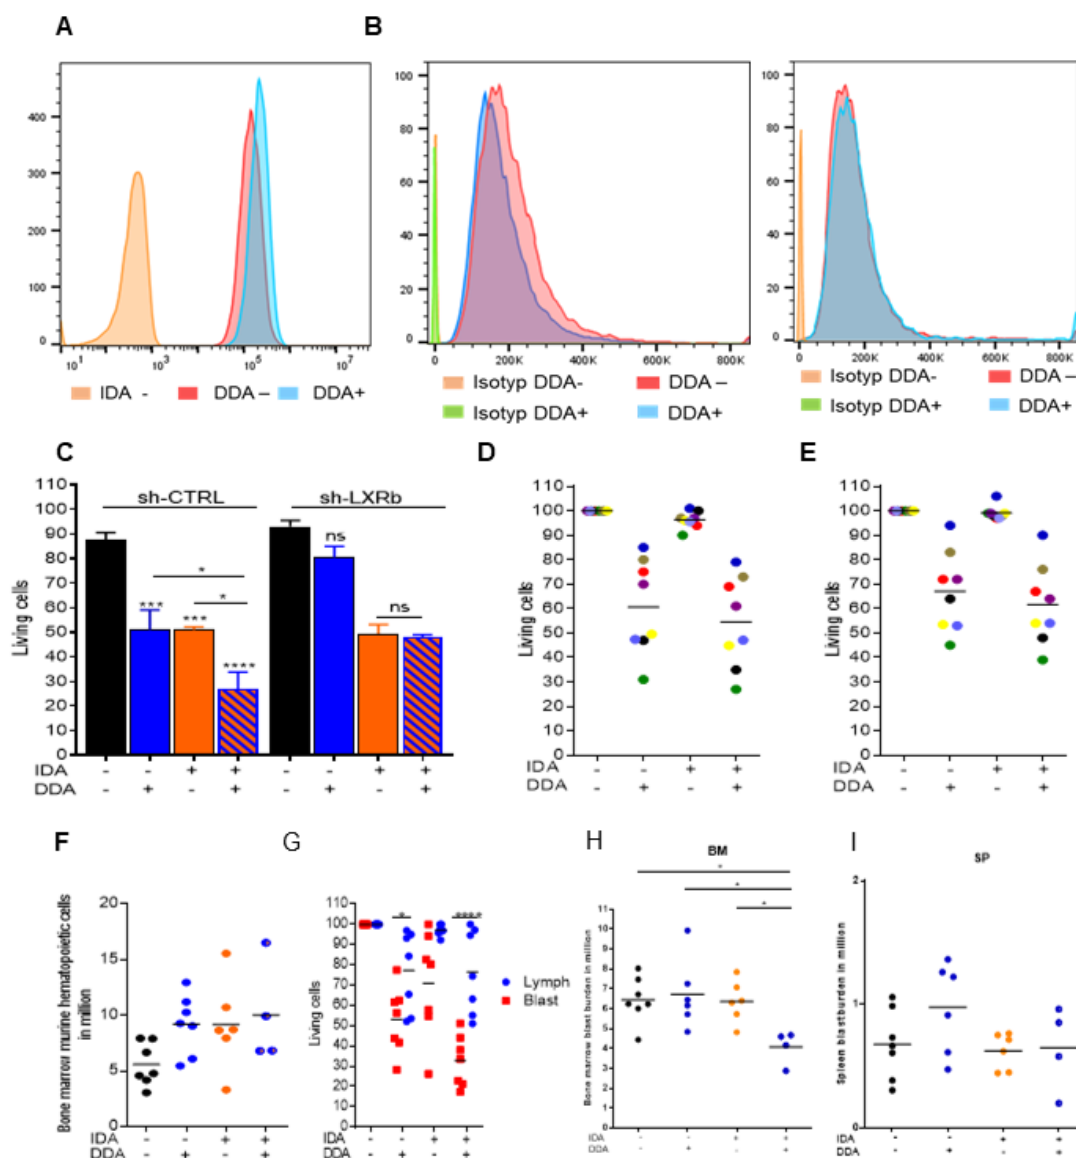

**Figure S1.** Combined DDA and daunorubicin synergistically induce the death of AML cells. **(A)** Intra-cellular daunorubicin measurement by flow cytometry on KG1a cells after 24 h pretreatment with DDA (2.5) or vehicle and treated 30 min with daunorubicin or vehicle. Data were represented as fluorescence intensity relative, in annexin-V-/7AAD-cells. **(B)** PgP membrane expression measurement by flow cytometry on KG1-shCTRL or KG1-shLXR $\beta$  cells after 24 h treatment with DDA (2.5) or vehicle. Data were represented as fluorescence intensity relative, in annexin-V-/7AAD-cells. **(C)** Cell death measurement by Trypan Bleu exclusion test on shCTRL- and shLXR $\beta$ -expressing KG1 cells treated for 48 h with DDA (5  $\mu$ M), IDA (50 nM) or both DDA and IDA (5  $\mu$ M/50 nM). Bars are mean  $\pm$  SD of 3 independent experiments. **(D)** PBMC from healthy controls (*n*

= 8) samples were treated with DDA (2.5  $\mu$ M) or IDA (10 nM) or both DDA and IDA (2.5/10 nM) or vehicle for 48 h. Cell death was assessed in all hematopoietic cells (CD45+) using annexinV/7AAD staining. Data were represented as % of survival corresponding to annexin-V-/7AAD-cells relative to total cells. (E) PBMCs from healthy controls ( $n = 8$ ) samples were treated with DDA (2.5  $\mu$ M) or IDA (10 nM) or both DDA and 20IDA (2.5/10 nM) or vehicle for 48 h. Cell death was assessed in T-and B-lymphocytes (CD45+CD3+ or CD45+CD19+) using annexinV/7AAD staining. Data were represented as % of survival corresponding to annexin-V-/7AAD-cells relative to total cells. (F) Hematopoietic cell content in bone marrow and spleen was measured by flow cytometry using human anti-CD45, anti-CD45.1 and human anti-CD33 antibodies. (G) In 7 blood samples from leukemic patients, the response of AML cells and normal lymphocytes treated 48 h with vehicle, DDA, IDA or both IDA and DDA were analyzed. Data were represented as % of survival corresponding to annexin-V-/7AAD-cells relative to total cells in lymphocytes (blue) or AML blasts (red). (H) Bone marrow cell tumor burden of MOLM14 orthotopically xenografted NSG mice were treated with DDA (20 mg/kg/day by i.p injection) or IDA (0.15 mg/kg/day every two days for 5 days by i.v injection) or both DDA and IDA or vehicle control. MOLM-14 leukemic cell burden in bone marrow and spleen was measured by flow cytometry using human anti-CD45, anti-CD45.1 and human anti-CD33 antibodies. (I) Spleen cell tumor burden of MOLM14 orthotopically xenografted NSG mice were treated with DDA (20 mg/kg/day by i.p injection) or IDA (0.15 mg/kg/day every two days for 5 days by i.v injection) or both DDA and IDA or vehicle control. MOLM-14 leukemic cell burden in bone marrow and spleen was measured by flow cytometry using human anti-CD45, anti-CD45.1 and human anti-CD33 antibodies. \*  $p < 0.05$ , \*\*  $p < 0.01$  and \*\*\*  $p < 0.001$ .

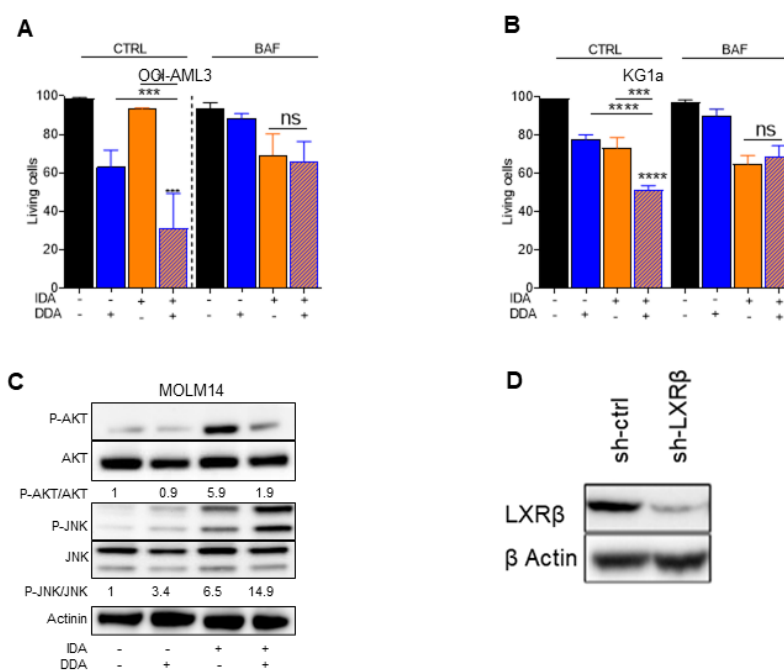

**Figure S2.** Implication of autophagy after DDA-IDA treatment. (A–B) Cell death measurement by flow cytometry after autophagy inhibition on OCI-AM3 and KG1a cells treated for 48 h with DDA, IDA or both DDA and IDA in the presence or absence of bafilomycin A1. Data were represented as % of survival corresponding to annexin-V-/7AAD-cells. Bars are mean  $\pm$  SD of 3 independent experiments. Cell death measurement by Trypan Blue exclusion test after autophagy inhibition on MOLM-14 cells treated for 48 h with DDA, IDA or both DDA and IDA in the presence or absence of bafilomycin A1. Bars are mean  $\pm$  SD of 3 independent experiments. (C) Western blot analysis of the expression of p-AKT, AKT, JNK and p-JNK in MOLM-14 cells treated 5 h with vehicle, DDA, IDA or both IDA and DDA. (D) Immunoblot of LXR $\beta$  expression in KG1 cells stably transfected with control shRNA (sh-CTRL) or with shRNA against LXR $\beta$  (Sh-LXR $\beta$ ). \*  $p < 0.05$ , \*\*  $p < 0.01$  and \*\*\*  $p < 0.001$ .

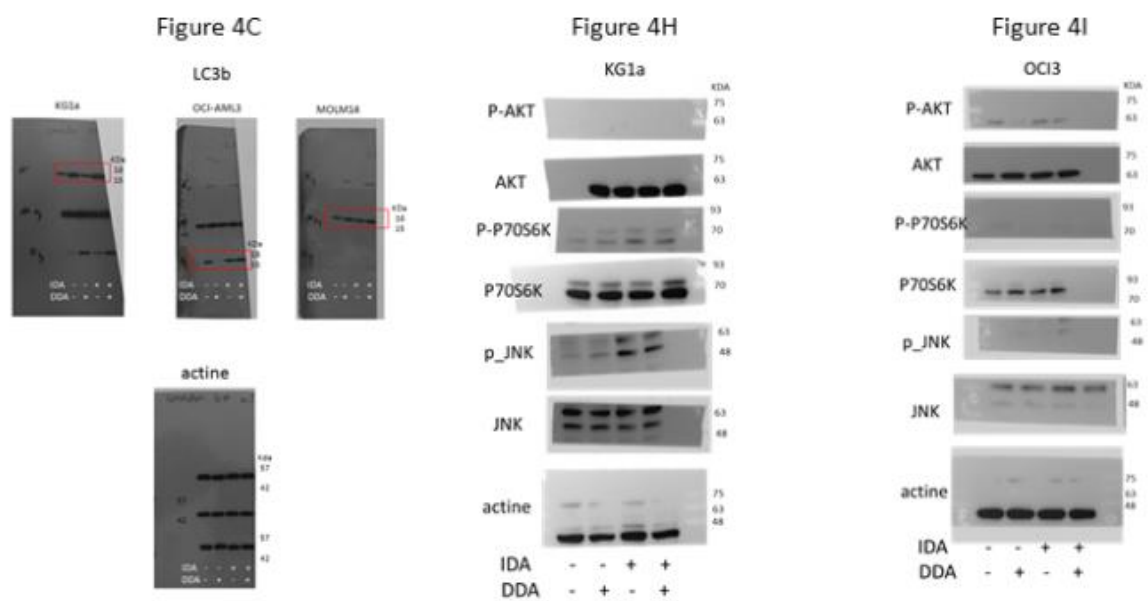

Figure S3. Uncropped Western Blot from Figure 4.

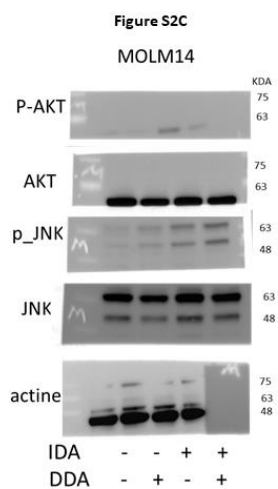

Uncropped Western Blot from Figure S2.

**Table S1.** Values of combination index presented in Figure 1.

| Cell Line | Affected Fraction | Combination Index | Cell Line | Affected Fraction | Combination Index | Cell Line | Affected Fraction | Combination Index |
|-----------|-------------------|-------------------|-----------|-------------------|-------------------|-----------|-------------------|-------------------|
| KG1       | 0.1               | 0.63              | MV4-11    | 0.1               | 0.4714            | KG1a      | 0.1               | 0.214             |
| KG1       | 0.2               | 0.6818            | MV4-11    | 0.2               | 0.5               | KG1a      | 0.2               | 0.178             |
| KG1       | 0.3               | 0.697             | MV4-11    | 0.3               | 0.5143            | KG1a      | 0.3               | 0.15              |
| KG1       | 0.4               | 0.7121            | MV4-11    | 0.4               | 0.5429            | KG1a      | 0.4               | 0.125             |
| KG1       | 0.5               | 0.7424            | MV4-11    | 0.5               | 0.5571            | KG1a      | 0.5               | 0.098             |
| KG1       | 0.6               | 0.7576            | MV4-11    | 0.6               | 0.5786            | KG1a      | 0.6               | 0.071             |
| KG1       | 0.7               | 0.7727            | MV4-11    | 0.7               | 0.6               | KG1a      | 0.7               | 0.0625            |
| KG1       | 0.8               | 0.7879            | MV4-11    | 0.8               | 0.621             | KG1a      | 0.8               | 0.0536            |
| KG1       | 0.9               | 0.8788            | MV4-11    | 0.9               | 0.6643            | KG1a      | 0.9               | 0.0447            |

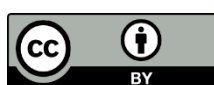

© 2020 by the authors. Licensee MDPI, Basel, Switzerland. This article is an open access article distributed under the terms and conditions of the Creative Commons Attribution (CC BY) license (<http://creativecommons.org/licenses/by/4.0/>).
